# Supplementary material for: An applied noise model for scintillation-based CCD detectors in transmission electron microscopy
Source: Research Square preprint supplement (doi:10.21203/rs.3.rs-4183951/v2), 2024-08-15
Supplement: Supplementary file [file 9fc4914049b80afa98136dbd.pdf]

# An applied noise model for scintillation-based CCD detectors in transmission electron microscopy

Christian Zietlow<sup>1,\*</sup> and Jörg K. N. Lindner<sup>1</sup>

<sup>1</sup>Nanopatterning-Nanoanalysis-Photonic Materials Group, Department of Physics, Paderborn University, Warburgerstr. 100, 33098 Paderborn

\*christian.zietlow@upb.de

## A Supplementary material

Our noise model contains a lot of (slightly) different variables. This supplementary information aims to support the readability of the paper by giving a short explanation of the respective variables.

### Running indices and miscellaneous:

|                      |                                                                                                          |
|----------------------|----------------------------------------------------------------------------------------------------------|
| $i, j$               | - index of the respective row, column.                                                                   |
| $m, n$               | - index of the respective horizontal, vertical lag.                                                      |
| $M, N$               | - number of total pixels in horizontal, vertical direction.                                              |
| $H, V$               | - number of horizontally, vertically added pixels.                                                       |
| $w$                  | - added images.                                                                                          |
| $p$                  | - probability of correlated electrons in the electron beam.                                              |
| $p_{STEM}$           | - probability of correlated electrons in the electron beam for STEM-mode.                                |
| $\rho_{TEM}$         | - Pearson correlation coefficient of the electron beam in TEM mode.                                      |
| $\rho$               | - Pearson correlation coefficient of the complete image formation.                                       |
| $\rho_{disp}$        | - Pearson correlation coefficient of the dispersed electron beam in STEM mode.                           |
| $\rho_{EELS}$        | - Pearson correlation coefficient of a 2D EELS signal.                                                   |
| $K(\xi)$             | - autocovariance function of the image $\xi$ .                                                           |
| $K^+(\xi)$           | - positivity constrained autocovariance function of the image $\xi$ .                                    |
| $x_1, x_2, x_3$      | - fit parameters for the gain linearization correction.                                                  |
| $Z$                  | - used images for the non-linearity functional.                                                          |
| $\mathcal{G}_{corr}$ | - offsetted Gaussian fit for the beam correlation in the Pearson correlation coefficients of the signal. |

### Gains and gain distributions:

|                        |                                                                                                                           |
|------------------------|---------------------------------------------------------------------------------------------------------------------------|
| $g_{fl}$               | - gain of the fluorescence layer.                                                                                         |
| $g_{opt}$              | - gain of the fiber optics layer.                                                                                         |
| $g_{CCD}$              | - gain of the CCD detector.                                                                                               |
| $g_c$                  | - conversion gain from charge carriers in the CCD to counts.                                                              |
| $g_d$                  | - mean gain of the total detector including the gains $g_{fl}$ , $g_{opt}$ and $g_{CCD}$ .                                |
| $G_d$                  | - gain of the detector including the variations from pixel to pixel.                                                      |
| $\mathcal{X}[g]$       | - distribution of the quantum efficiencies from pixel to pixel.                                                           |
| $g$                    | - mean gain of the total detector $g_d$ with the conversion gain $g_c$ to convert charge carriers into counts.            |
| $\mathcal{X}[\bar{g}]$ | - normalized distribution of the quantum efficiencies from pixel to pixel around the mean gain $g_d$ .                    |
| $\mathcal{X}_R$        | - ration between the gain distribution at a given signal level and the signal level the gain reference was acquired with. |
| $g_{lin}$              | - correction to linearize the non-linear gain throughout the whole dynamic range of the detector.                         |
| $\bar{g}_{lin}$        | - mean value of the gain linearization of an image.                                                                       |

### Noises, dark currents and uncertainties:

|                    |                                                                                                                                                              |
|--------------------|--------------------------------------------------------------------------------------------------------------------------------------------------------------|
| $\sigma_{read}$    | - read out noise of the CCD.                                                                                                                                 |
| $\sigma_{therm}$   | - thermal noise of the CCD.                                                                                                                                  |
| $\sigma_{row,j}$   | - row noise of the CCD, where the offset value of a given row is constant over all pixels in that row.                                                       |
| $\mu_{row}$        | - offset value of a given row.                                                                                                                               |
| $\hat{\mu}_{read}$ | - offset value of the detector due to row noise and the bias of the image to prevent negative counts.                                                        |
| $\mu_{therm}$      | - offset value of the detector due to dark currents.                                                                                                         |
| $Y[\mu_{therm}]$   | - distribution of dark currents.                                                                                                                             |
| $I_{dark}$         | - dark current.                                                                                                                                              |
| $t_{acq}$          | - acquisition time.                                                                                                                                          |
| $\sigma_d$         | - detector noise, inheriting $\sigma_{read}$ , $\sigma_{therm}$ and $\sigma_{row,j}$ .                                                                       |
| $k_{ref}$          | - uncertainty of the gain reference.                                                                                                                         |
| $k_{ref,w}$        | - uncertainty of the gain reference with $w$ summed up signal and background frames.                                                                         |
| $\sigma_{ref}$     | - standard deviation of the gain reference.                                                                                                                  |
| $\phi_{ref}$       | - mean value of the gain reference (all quadrant differ from 1).                                                                                             |
| $\sigma_d^*$       | - detector noise varied by the standard deviation $\sigma_{ref}$ of the gain reference and its respective mean value $\phi_{ref}$ of each detector quadrant. |
| $\sigma_{QE}$      | - standard deviation of the quantum efficiencies of the detector.                                                                                            |
| $k_{lin}$          | - uncertainty of the gain linearization correction.                                                                                                          |
| $k_{ref}^*$        | - uncertainty of the linearization corrected gain reference.                                                                                                 |
| $\sigma_{d,corr}$  | - detector noise varied by the the gain referenec and the gain linearization.                                                                                |
| $k$                | - combined uncertainty of the linearization corrected gain reference and the linearization correction.                                                       |
| $k_{ref}^{*,H,V}$  | - uncertainty of the linearization corrected gain reference under binning H pixels horizontally and V pixels vertically.                                     |
| $\alpha_{H,V}$     | - distribution factor of the signal on the binned pixels.                                                                                                    |
| $\sigma_{total}$   | total noise standard deviation of a given image containing all noise contributions.                                                                          |

### Signals of the electron beam:

|                 |                                                                                                                                                  |
|-----------------|--------------------------------------------------------------------------------------------------------------------------------------------------|
| $\hat{S}$       | - expectation value of any of the following signals.                                                                                             |
| $\bar{S}$       | - mean value of any of the following signals.                                                                                                    |
| $S_{src,el}$    | - stream of electrons from a point source or electron gun.                                                                                       |
| $B_{el}$        | - total electron beam (consisting of uncorrelated and correlated electrons).                                                                     |
| $S_{el}$        | - total electron beam, broadened by the deflection of the electron-optical system.                                                               |
| $S_d$           | - total electron beam converted into charge carriers by the CCD.                                                                                 |
| $S_c$           | - total electron beam converted into counts.                                                                                                     |
| $S_{\Omega,el}$ | - total electron beam broadened by the detector point spread function.                                                                           |
| $S_{ref}$       | - total electron beam used for the acquisition of the gain reference.                                                                            |
| $S_{ref,c}$     | - total electron beam used for the acquisition of the gain reference, converted into counts.                                                     |
| $S_{ref,c,w}$   | - total electron beam used for the acquisition of the gain reference, converted into counts and with $w$ summed up signal and background frames. |
| $B_{disp}$      | - dispersed total electron beam (consisting of uncorrelated and correlated electrons) in STEM mode.                                              |
| $S_{EELS,el}$   | - 2D EELS signal in electrons.                                                                                                                   |
| $S_{EELS,c}$    | - 2D EELS signal converted into counts.                                                                                                          |

### Signal broadening point spread functions (PSF) / convolution kernels:

|                 |                                                                                                                                                             |
|-----------------|-------------------------------------------------------------------------------------------------------------------------------------------------------------|
| $\Omega^*$      | - denotes the normalization of the respective PSF to the height of one.                                                                                     |
| $\Omega_{TEM}$  | - deflection acting on of all the beam electrons to form a beam disc in TEM mode, normalized to the height of one.                                          |
| $\Omega_{fl}$   | - PSF of the fluorescence layer of the detector.                                                                                                            |
| $\Omega_{opt}$  | - PSF of the fiber optics layer of the detector.                                                                                                            |
| $\Omega_{CCD}$  | - PSF of the CCD of the detector.                                                                                                                           |
| $\Omega_d$      | - PSF of the complete detector, including $\Omega_{fl}$ , $\Omega_{opt}$ and $\Omega_{CCD}$ .                                                               |
| $\Omega_{STEM}$ | - deflection acting on of all the beam electrons to form a point like signal in STEM mode.                                                                  |
| $\Omega_{disp}$ | - deflection acting on of all the beam electrons in the energy filter of the <i>Gatan GIF</i> to form a dispersed energy signal used for EELS measurements. |
| $\Omega_{ZLP}$  | - combines both the dispersion PSF $\Omega_{disp}$ and the detector PSF $\Omega_d$ to represent the PSF leading to a ZLP in vacuum.                         |

### Smoothing factors:

- $\beta_{TEM,conv}$  - smoothing factor of the beam convolution with  $\Omega_{TEM}$ .
- $\beta_{TEM,corr}$  - smoothing factor of the beam correlation in TEM mode.
- $\beta_{TEM}$  - smoothing factor including both beam smoothing factors for correlation and convolution in TEM mode.
  
- $\beta_{fl,conv}$  - smoothing factor of the convolution of the fluorescence layer  $\Omega_{fl}$ .
- $\beta_{fl,corr}$  - smoothing factor of the correlation induced by the fluorescence layer.
- $\beta_{fl}$  - smoothing factor including both fluorescence layer smoothing factors for correlation and convolution.
  
- $\beta_{opt,conv}$  - smoothing factor of the convolution of the fiber optics layer  $\Omega_{opt}$ .
- $\beta_{opt,corr}$  - smoothing factor of the correlation induced by the fiber optics layer.
- $\beta_{opt}$  - smoothing factor including both fiber optics layer smoothing factors for correlation and convolution.
  
- $\beta_{CCD,conv}$  - smoothing factor of the convolution of the CCD  $\Omega_{CCD}$ .
- $\beta_{CCD,corr}$  - smoothing factor of the correlation induced by the CCD.
- $\beta_{CCD}$  - smoothing factor including both CCD smoothing factors for correlation and convolution.
  
- $\beta_{conv}$  - smoothing factor of all of the above convolutions.
- $\beta_{corr}$  - smoothing factor of all of the above correlations.
- $\beta$  - smoothing factor including both the smoothing factors for correlation and convolution of all of the above smoothing factors.
- $\beta_{BF}$  - smoothing by the brighter-fatter effect.
- $\beta_{H,V}$  - smoothing factor after binning H pixel horizontally and V pixel vertically.
- $\beta_{BF,H,V}$  - brighter-fatter smoothing factor after binning H pixel horizontally and V pixel vertically.
- $\beta^*$  - combines the smoothing factor  $\beta$  with the brighter-fatter smoothing  $\beta_{BF}$ .
- $\beta_{EELS}$  - smoothing factor of a 2D EELS signal (similar to  $\beta_{TEM}$ ).
- $\beta_{EELS,1,V}$  - smoothing factor of an EEL spectrum after binning V pixels vertically.

### Images:

- $\xi$  - unprocessed image as acquired.
- $\xi_{dark}$  - dark frame image.
- $\xi_{DS}$  - dark frame subtracted image.
- $\xi_{ref,SF}$  - unprocessed signal frame image of the gain reference.
- $\xi_{ref,DF}$  - dark frame image of the gain reference.
- $\xi_{ref,DS}$  - difference signal image of the gain reference.
- $\xi_{ref,DB}$  - difference background image of the gain reference.
- $\xi_{ref}$  - gain reference.
- $\xi_{ref,w}$  - gain reference with  $w$  summed up signal and background frames.
- $\zeta_{ref}$  - actual representation of the noise on top of the gain reference.
- $\xi^*$  - dark frame subtracted and gain normalized image.
- $\xi_{corr}$  - dark frame subtracted, gain normalized and gain linearized image.
- $\xi_{Bin,H,V}^{corr}$  - dark frame subtracted, gain normalized and gain linearized image, after binning H pixel horizontally and V pixels vertically.
- $\xi_{ref}^{corr}$  - non-linearity corrected gain reference.
- $\xi_{EELS}^{corr}$  - dark frame subtracted, gain normalized and gain linearized EEL spectrum.
